# Supplementary material
Source: publisher figshare collection journal article supplement (https://acs.figshare.com/ndownloader/files/3720400)
Supplement: Supplementary file 1 [file 3720400]

## Supplementary Information

### Construction of Lasso Peptide Fusion Proteins

Chuhan Zong<sup>1</sup>, Mikhail O. Maksimov<sup>2</sup>, A. James Link<sup>2,3\*</sup>  
Departments of <sup>1</sup>Chemistry, <sup>2</sup>Chemical and Biological Engineering, and <sup>3</sup>Molecular  
Biology, Princeton University, Princeton, NJ 08544  
\*to whom correspondence should be addressed, [ajlink@princeton.edu](mailto:ajlink@princeton.edu)

### Contents

Supplementary Tables: Pages S2-S3

Supplementary Figures: Pages S4-S13

Table S1: Plasmids used in this study

| Plasmid Name | Description                            | Primer       |
|--------------|----------------------------------------|--------------|
| pCA14        | AtxB1C1                                | NA           |
| pMM32        | AtxA1-B1C1                             | NA           |
| pQE9-A1      | A1                                     | NA           |
| pDA38        | sfGFP                                  | NA           |
| pJP47        | (GSSG) <sub>5</sub>                    | NA           |
|              |                                        |              |
| pCZ1         | Atx1-A1-BC                             | 1,2,3,4      |
| pCZ5         | Atx1-A1-B                              | 1,5          |
| pCZ2         | Atx1-A1-woBC                           | 1,6          |
|              |                                        |              |
| pCZ16        | Atx1-(GSSG) <sub>5</sub> -A1-BC        | 1,4,7,8,9,10 |
| pCZ20        | Atx1-(GSSG) <sub>5</sub> -A1-B         | 1,5          |
| pCZ21        | Atx1-(GSSG) <sub>5</sub> -A1-woBC      | 1,6          |
|              |                                        |              |
| pCZ43        | Atx1-(GSSG) <sub>5</sub> -Thb-A1-BC    | 1,4,11,12    |
| pCZ44        | Atx1-(GSSG) <sub>5</sub> -Thb-A1-B     | 1,5          |
| pCZ45        | Atx1-(GSSG) <sub>5</sub> -Thb-A1-woBC  | 1,6          |
|              |                                        |              |
| pCZ25        | Atx1-(GSSG) <sub>2</sub> -A1-BC        | 1,4,13,14    |
| pCZ26        | Atx1-(GSSG) <sub>2</sub> -A1-B         | 1,5          |
| pCZ27        | Atx1-(GSSG) <sub>2</sub> -A1-woBC      | 1,6          |
|              |                                        |              |
| pCZ29        | Atx1-(GSSG) <sub>2</sub> -Thb-A1-BC    | 1,4,15,16    |
| pCZ40        | Atx1-(GSSG) <sub>2</sub> -Thb-A1-B     | 1,5          |
| pCZ39        | Atx1-(GSSG) <sub>2</sub> -Thb-A1-woBC  | 1,6          |
|              |                                        |              |
| pCZ22        | Atx1-(GSSG) <sub>5</sub> -sfGFP-BC     | 1,4,17,18    |
| pCZ46        | Atx1-(GSSG) <sub>5</sub> -Thb-sfGFP-BC | 1,4,18,19    |

Table S2: Sequences of primers used in this study

| Primer    | Sequence                                                                    |
|-----------|-----------------------------------------------------------------------------|
| Primer 1  | 5- AAT CGA ATT CTA AAT GAA AGG AGA GTT CGA AAT GC -3                        |
| Primer 2  | 5- GTC CTG GTT GAT GCG AGA CTC T -3                                         |
| Primer 3  | 5- TCG CAT CAA CCA GGA CGG ATC CAT GGC TAG CGG TG -3                        |
| Primer 4  | 5- GGA TAG ATC TTC AGT GAT GGT GAT GGT GAT GAT TAA GCT TGG CTG CAG GTC G -3 |
| Primer 5  | 5- CTA CCG ATC GGT ACC TCA GAC GAC CAG -3                                   |
| Primer 6  | 5- CCG ATC GGT ACC TCA GTG ATG GTG ATG -3                                   |
| Primer 7  | 5- GCA TCA ACC AGG ACG GCA GCT CCG GCG G -3                                 |
| Primer 8  | 5- CCG CCG GAG CTG CCGTCCTGGTTG ATG C -3                                    |
| Primer 9  | 5- GGG GTA GCT CAG GCA TGG CTA GCG GTG AC -3                                |
| Primer 10 | 5- GTC ACC GCT AGC CAT GCC TGA GCT ACC CC -3                                |
| Primer 11 | 5- CTG GTT CCG CGT GGA TCT ATG GCT AGC GG -3                                |
| Primer 12 | 5- AGA TCC ACG CGG AAC CAG GCC TGA GCT AC -3                                |
| Primer 13 | 5- GCA GCT CCG GCG GTA GCA GCG GAA TGG CTA GCG -3                           |
| Primer 14 | 5- CCG CTG CTA CCG CCG GAG CTG CCG TCC TGG TTG -3                           |
| Primer 15 | 5- CAG CGG ACT GGT TCC GCG TGG ATC TAT GGC TAG CGG -3                       |
| Primer 16 | 5- CTA GCC ATA GAT CCA CGC GGA ACC AGT CCG CTG CTA C -3                     |
| Primer 17 | 5- CGG GGG TAG CTC AGG CAT GAG CAA AGG AGA AG -3                            |
| Primer 18 | 5- CTT CTC CTT TGC TCA TGC CTG AGC TAC CCC CG -3                            |
| Primer 19 | 5- CTG GTT CCG CGT GGA TCT ATG AGC AAA GGA GAA G -3                         |

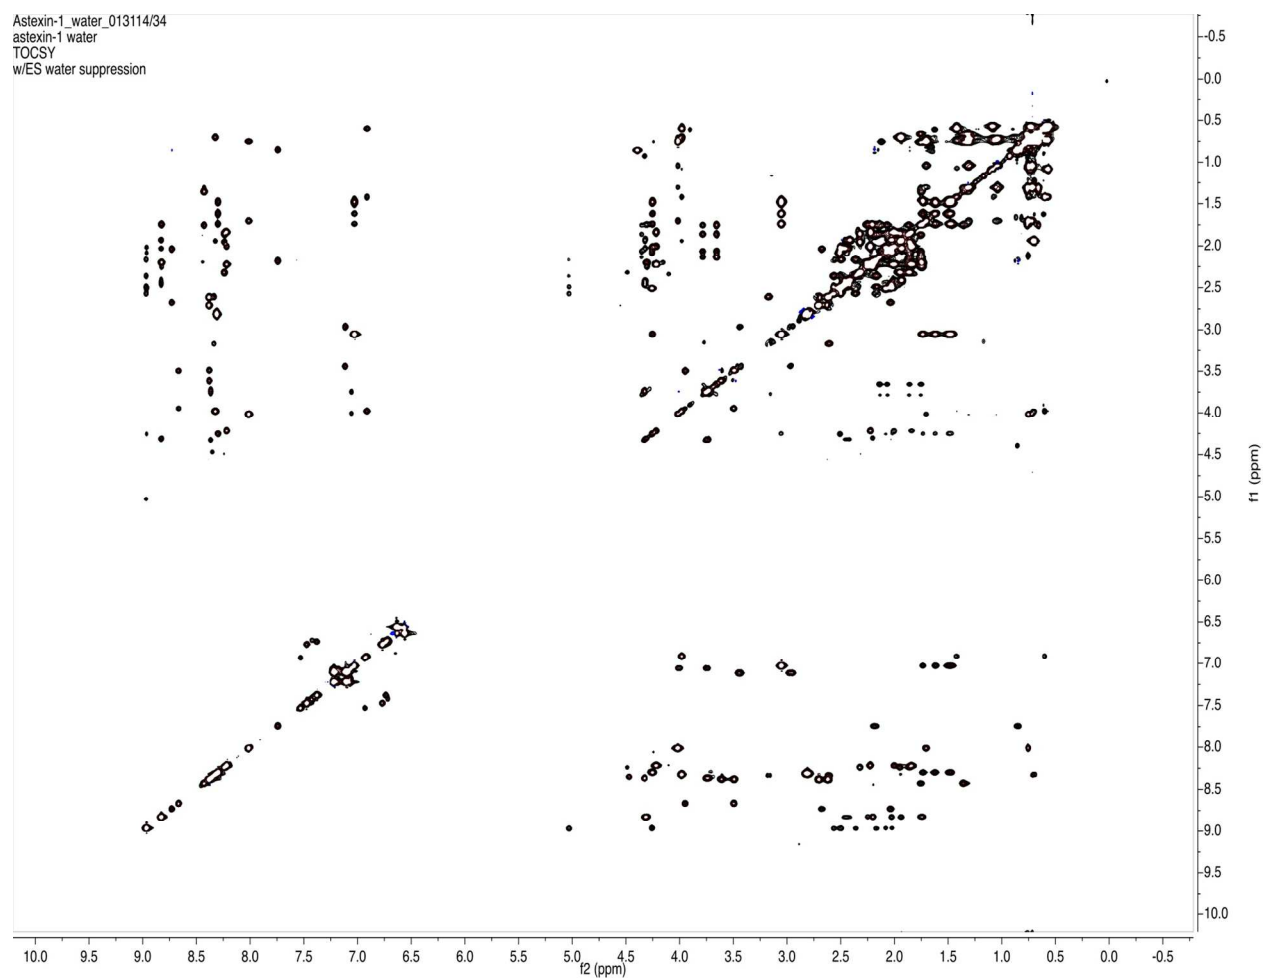

Figure S1: TOCSY spectrum of astexin-1 in  $\text{H}_2\text{O}/\text{D}_2\text{O}$ .

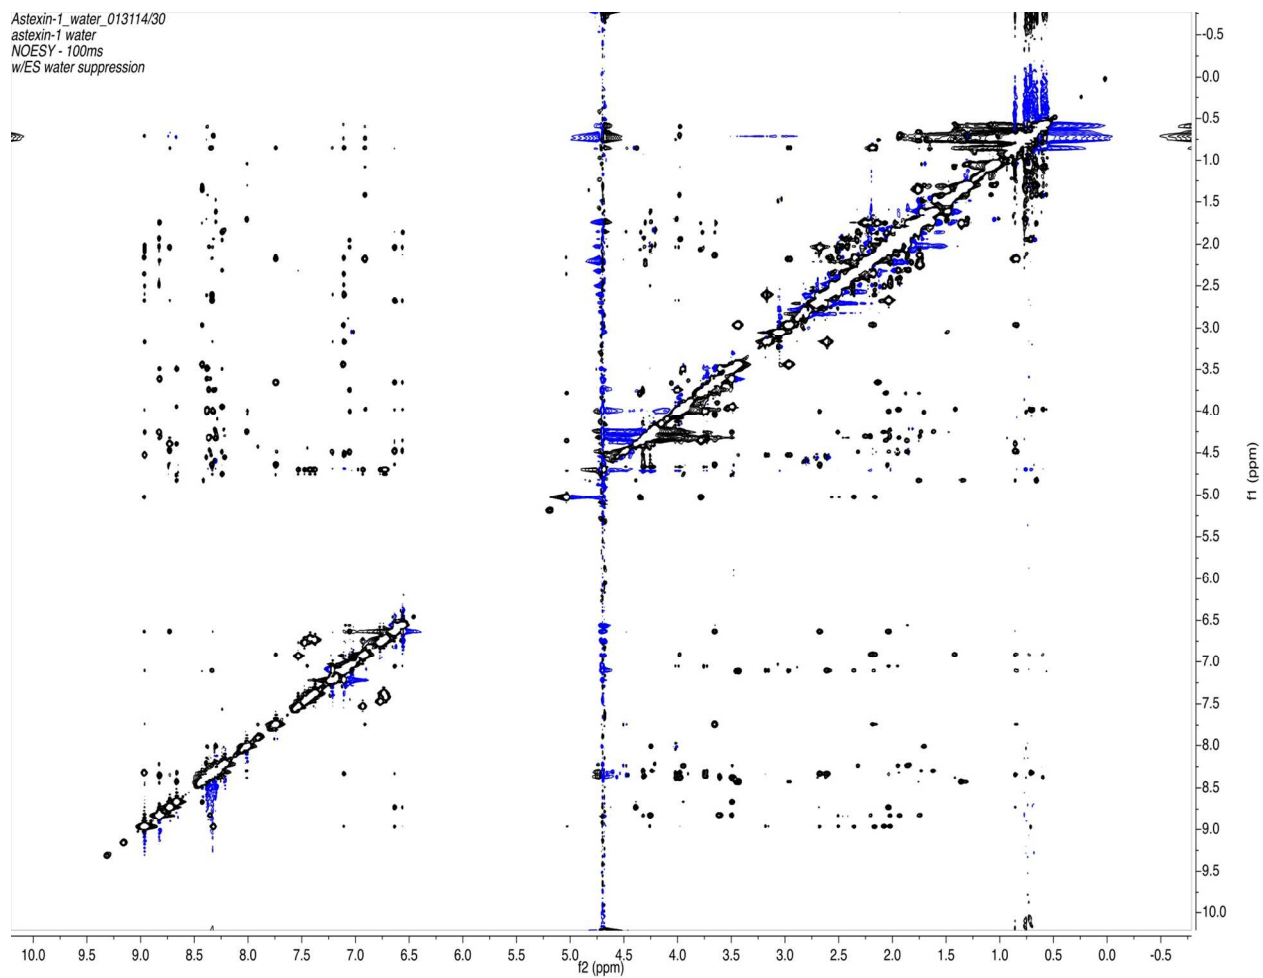

Figure S2: NOESY spectrum of astexin-1 in H<sub>2</sub>O/D<sub>2</sub>O, 100 ms mixing time

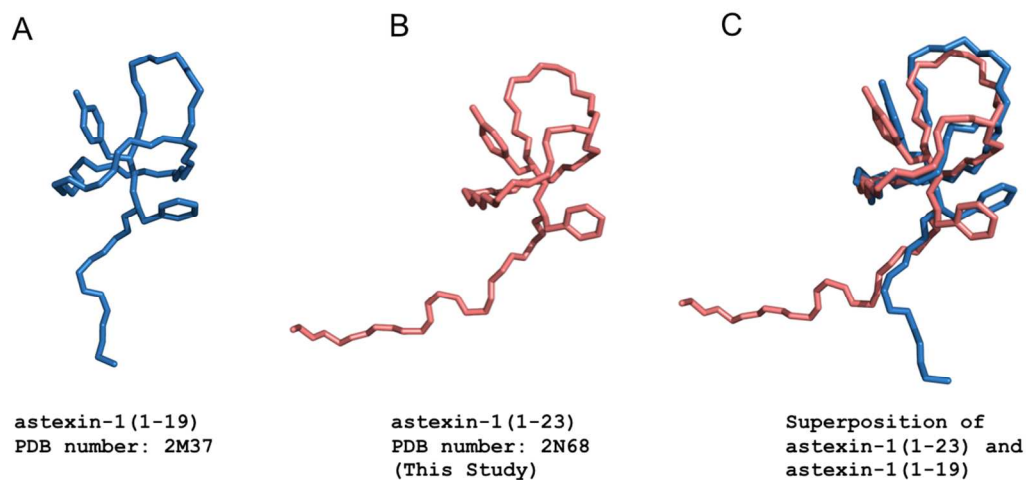

Figure S3: Comparison of astexin-1(1-23) structure to previously published astexin-1(1-19) structure. A: Lowest energy conformer of astexin-1(1-19) from PDB file 2M37. B: Lowest energy conformer of full-length astexin-1 from this work, PDB file 2N68. C: Superposition of the two structures showing their similarity.

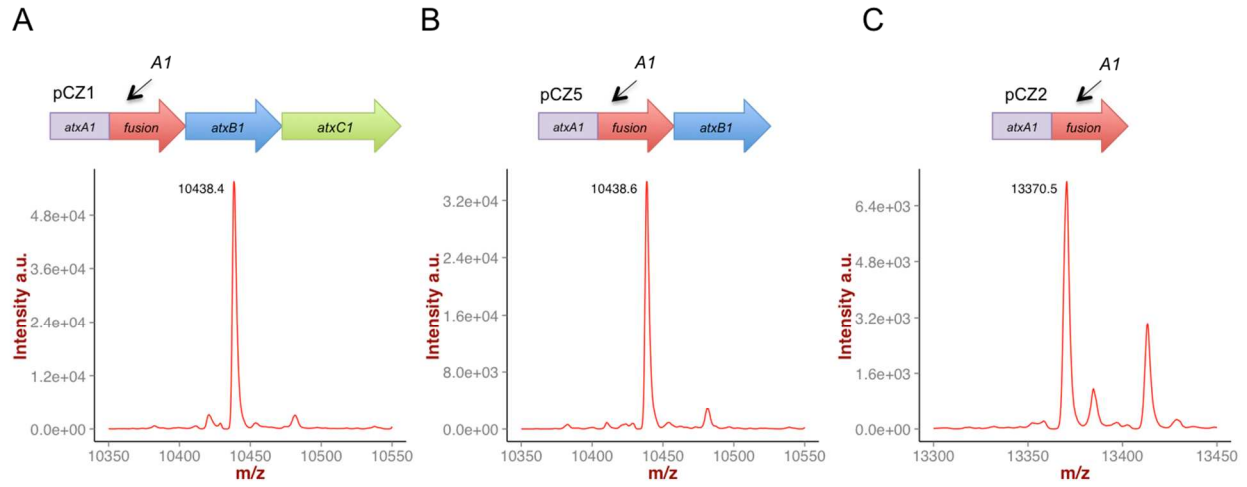

Figure S4: Electrospray mass spectra of direct fusions of astexin-1 to A1 leucine zipper. A: Deconvoluted spectrum of unlassoed astexin-1-A1 protein produced by full gene cluster in plasmid pCZ1. B: Spectrum of unlassoed protein produced by gene cluster lacking the *atxC1* gene. The leader peptide was still correctly processed but lasso cyclization did not occur. C: Spectrum of unprocessed, unlassoed protein produced by gene cluster lacking both the *atxB1* and *atxC1* genes. Refer to Table 1 for expected masses of each construct.

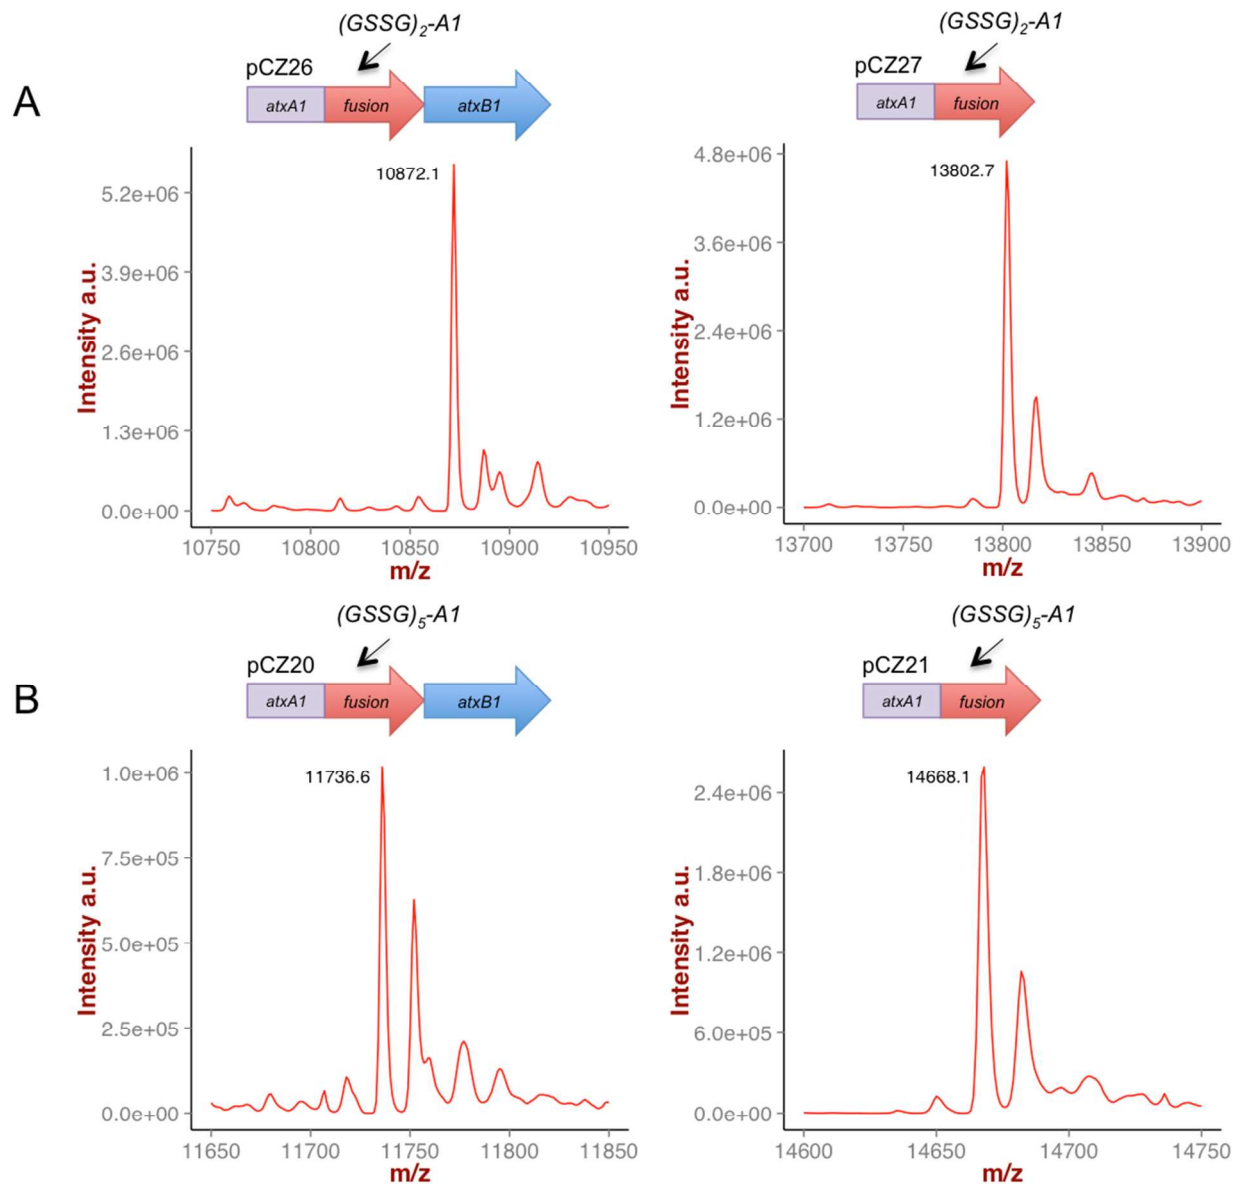

Figure S5: Deconvoluted mass spectra of astexin-1-(GSSG)<sub>x</sub>-A1 fusion proteins. A: Spectra of the astexin-1-(GSSG)<sub>2</sub>-A1 protein product of gene clusters lacking *atxB1* (left) or both *atxB1* and *atxC1* (right). B: As in panel A, but for the astexin-1-(GSSG)<sub>5</sub>-A1 protein.



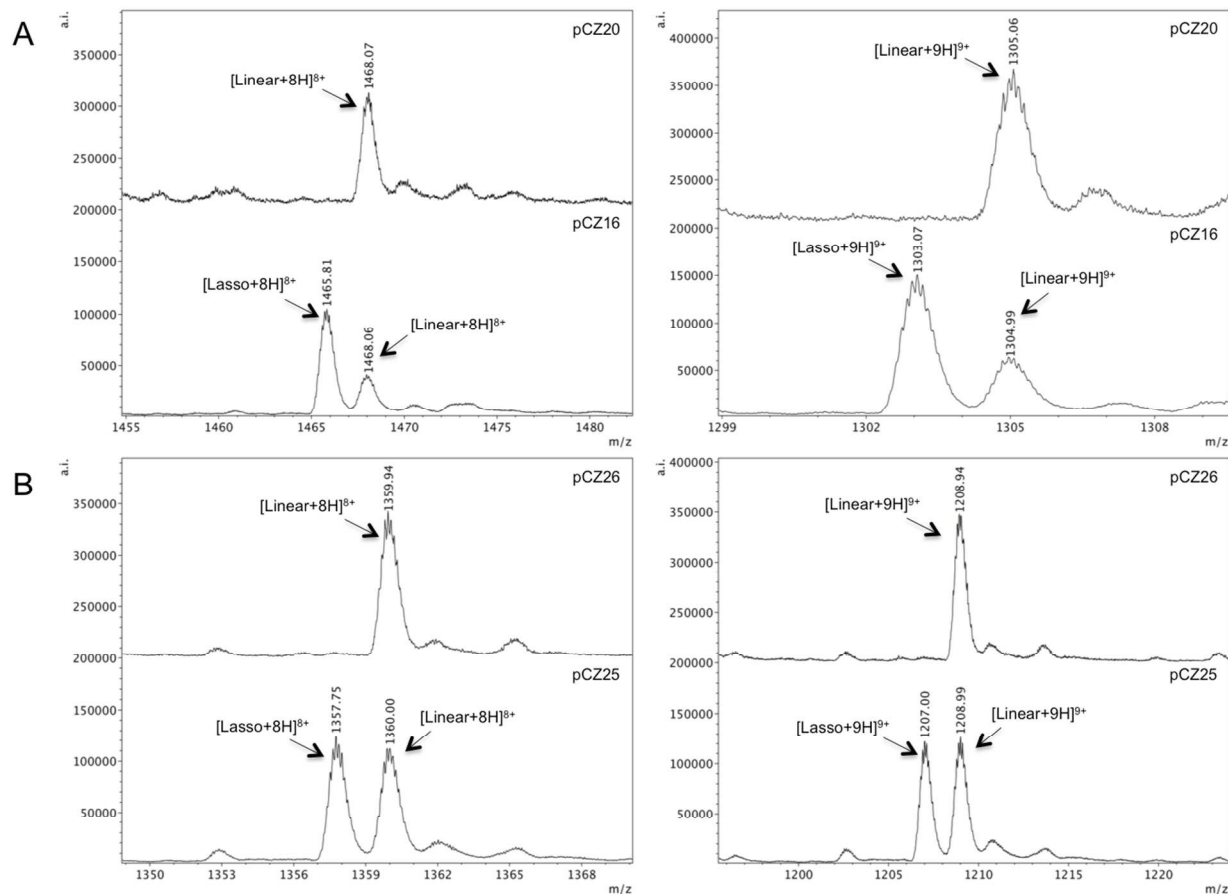

Figure S6: Raw mass spectra (before deconvolution) of the astexin-1-(GSSG)<sub>x</sub>-A1 proteins. A: Spectra of intact astexin-1-(GSSG)<sub>5</sub>-A1 protein in the +8 (left) and +9 (right) charge states. The top spectrum is of the protein product of the gene cluster lacking *atxC1* (plasmid pCZ20) while the bottom spectrum corresponds to the full gene cluster, housed on plasmid pCZ16. The difference between the mass of the lassoed and linear proteins are clearly discernible. B: As in panel A, but for the astexin-1-(GSSG)<sub>2</sub>-A1 protein. The plasmid pCZ26 is the gene cluster lacking *atxC1* and pCZ25 is the full gene cluster. This data was used to generate the deconvoluted spectra in Figures 2 and S5.

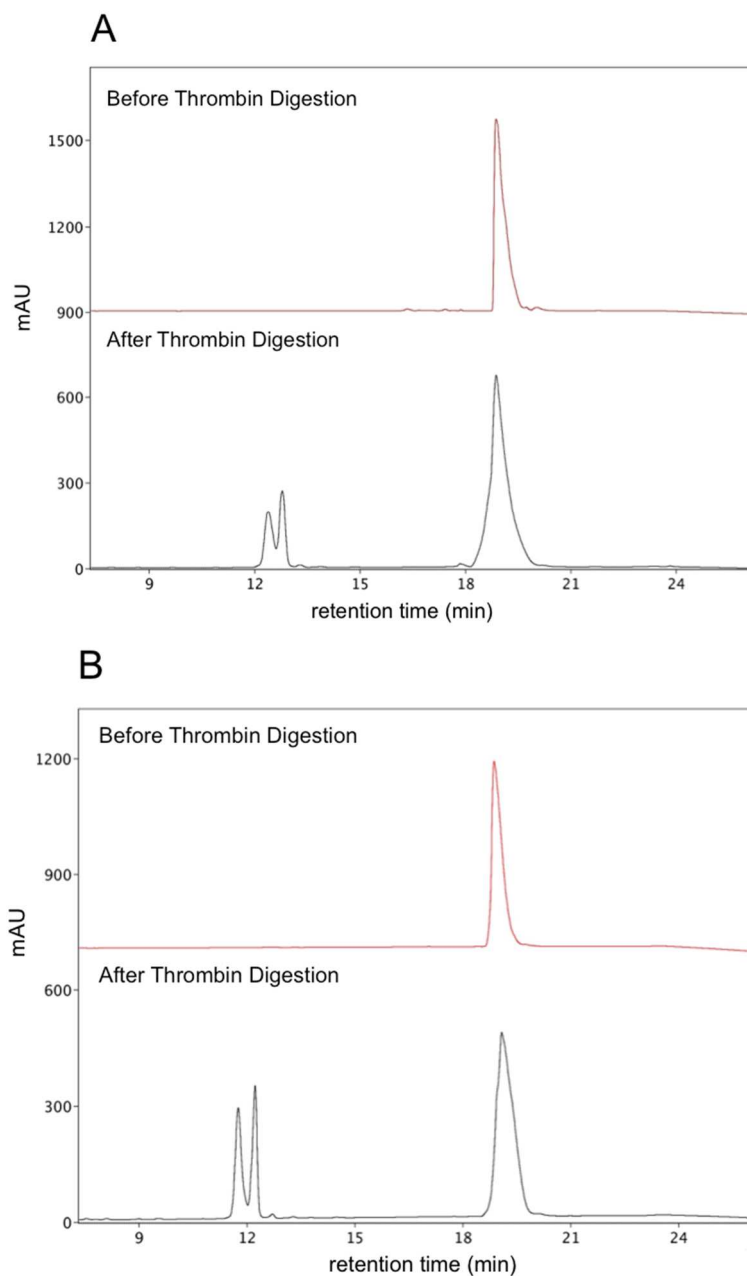

Figure S7: Thrombin digestion of astexin-1-(GSSG)<sub>x</sub>-thrombin-A1 proteins. A: HPLC traces of astexin-1-(GSSG)<sub>2</sub>-thrombin-A1 protein before (top) and after (bottom) thrombin digestion. The peaks for the lasso peptide and its linear counterpart are readily resolved. B: As in part A, but for the astexin-1-(GSSG)<sub>5</sub>-thrombin-A1 protein.

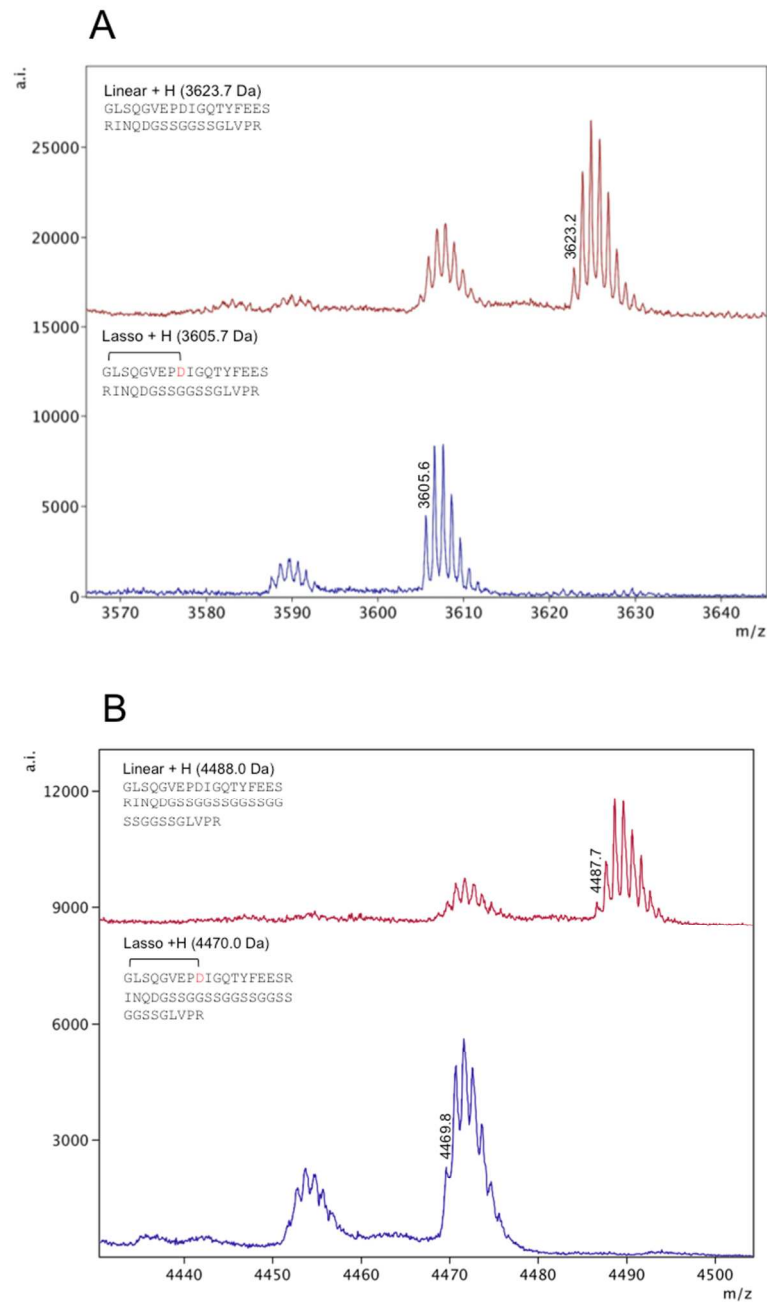

Figure S8: MALDI-MS analysis of thrombin-cleaved lasso and linear peptides. A: Spectrum of purified linear peptide (top) and lasso peptide (bottom) after thrombin digestion of the astexin-1-(GSSG)<sub>2</sub>-thrombin-A1 construct. B: As in A, but for the astexin-1-(GSSG)<sub>5</sub>-thrombin-A1 protein. The lower intensity peaks 18 mass units below the labeled peaks are from MALDI-induced dehydration due to the high laser intensity needed to analyze these high molecular weight species.

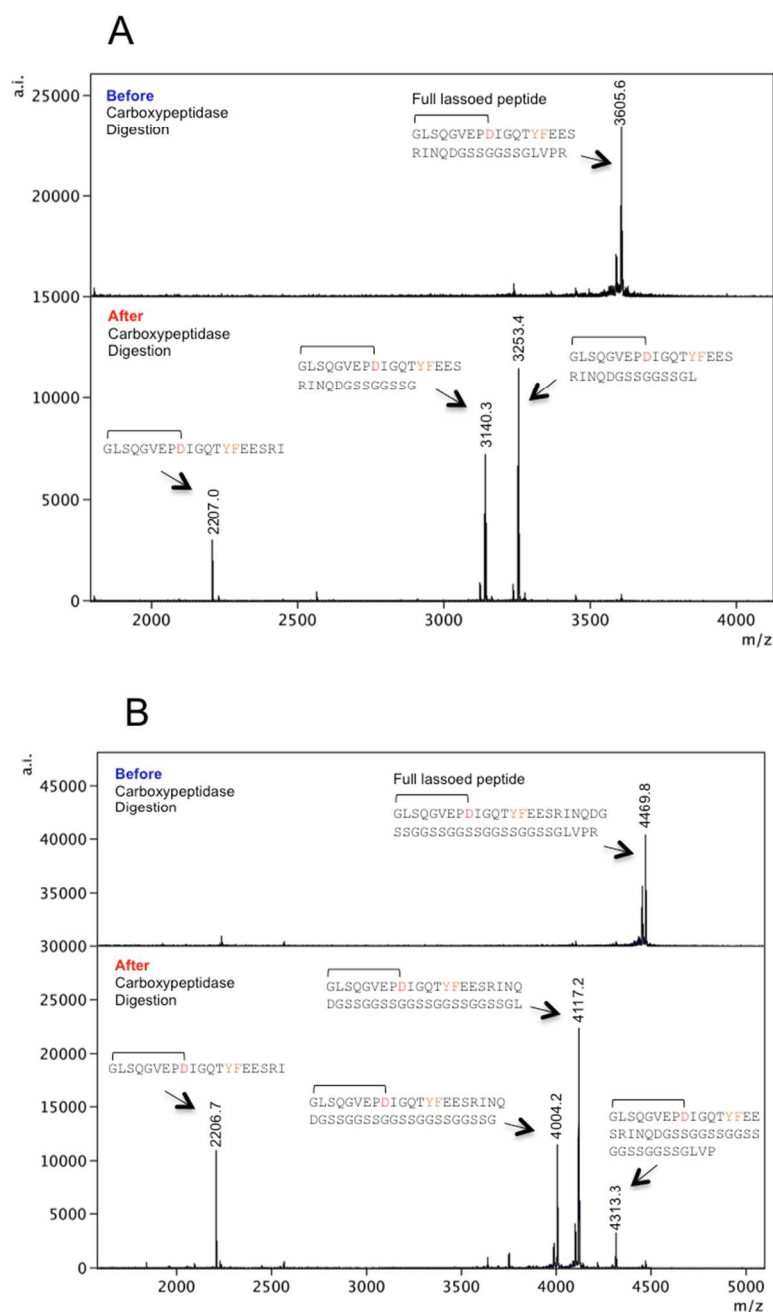

Figure S9: MALDI-MS analysis of carboxypeptidase-digested lasso peptides. Following thrombin cleavage and HPLC purification, the tail-extended astexin-1 peptides were digested with carboxypeptidase B and Y to confirm formation of the lasso structure. A: Lasso peptide derived from the astexin-1-(GSSG)<sub>2</sub>-thrombin-A1 protein B: Lasso peptide derived from the astexin-1-(GSSG)<sub>5</sub>-thrombin-A1 protein. In both cases, the carboxypeptidase digestion stops at residue Ile-20 due to steric hindrance of the lasso fold.

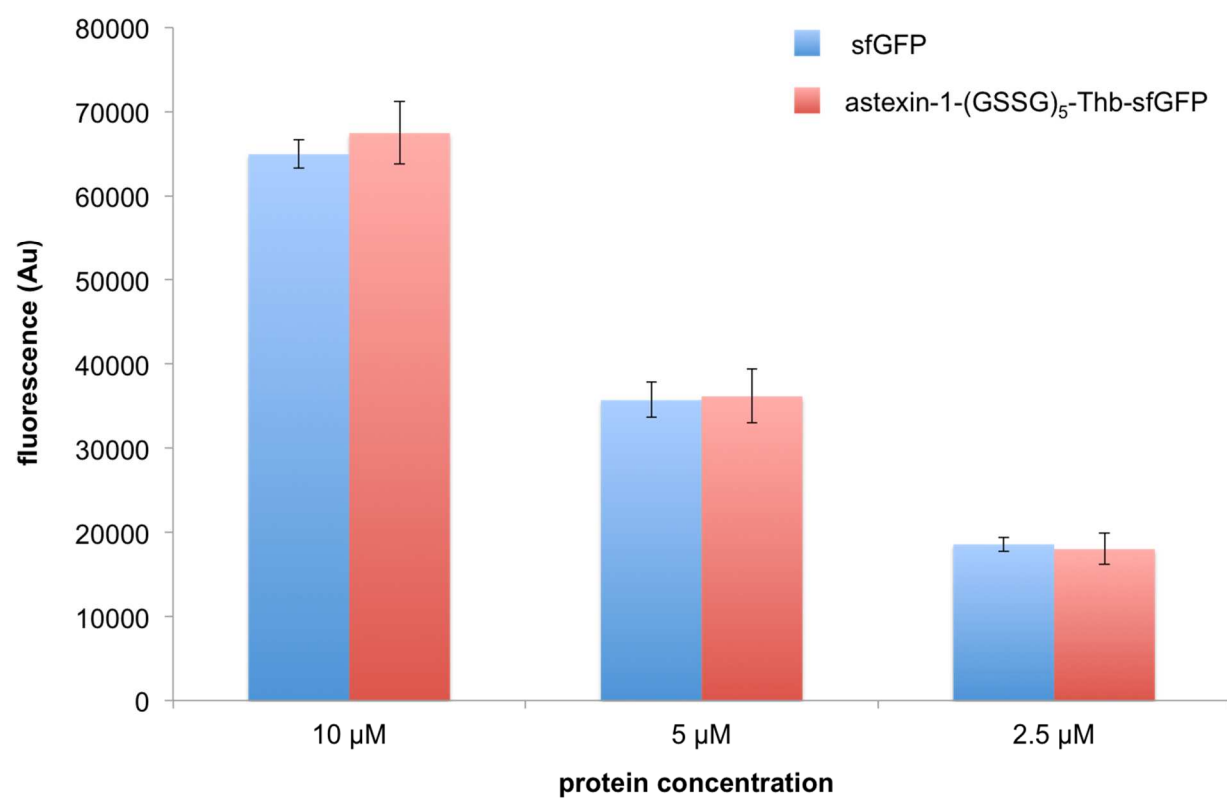

Figure S10: Comparison of the fluorescence of astexin-1-(GSSG)<sub>5</sub>-thrombin-superfolder GFP (red) to native superfolder GFP (blue).
